# Supplementary material
Source: PubMed Central journal article supplement (PMC5857215)
Supplement: NIHMS928431-supplement-2.pdf [file NIHMS928431-supplement-2.pdf]

**Supplementary Table 1:** Baseline associations between hippocampal volume and diffusion metrics of the tracts of interest

|                                          | Estimate | SE    | T-test | DOF | p-value          | 95% CI             |
|------------------------------------------|----------|-------|--------|-----|------------------|--------------------|
| <b>Left adjusted hippocampal volume</b>  |          |       |        |     |                  |                    |
| <b>Left HCB - FA</b>                     | 0.015    | 0.004 | 3.674  | 251 | <b>0.0003***</b> | [0.0071, 0.0233]   |
| <b>Left HCB - MD</b>                     | -0.002   | 0.001 | -2.269 | 251 | <b>0.026*</b>    | [-0.0039, -0.0003] |
| <b>Left HCB- AxD</b>                     | -0.001   | 0.001 | -0.684 | 251 | 0.504            | [-0.0030, 0.0015]  |
| <b>Left HCB - RD</b>                     | -0.003   | 0.001 | -2.882 | 251 | <b>0.005**</b>   | [-0.0043, -0.0008] |
| <b>Left UF - FA</b>                      | 0.003    | 0.004 | 0.673  | 248 | 0.500            | [-0.0056, 0.0114]  |
| <b>Left UF - MD</b>                      | -0.002   | 0.001 | -1.389 | 248 | 0.174            | [-0.0041, 0.0007]  |
| <b>Left UF - AxD</b>                     | -0.002   | 0.002 | -1.296 | 248 | 0.205            | [-0.0052, 0.0011]  |
| <b>Left UF - RD</b>                      | -0.002   | 0.001 | -1.361 | 248 | 0.181            | [-0.0038, 0.0007]  |
| <b>Right adjusted hippocampal volume</b> |          |       |        |     |                  |                    |
| <b>Right HCB - FA</b>                    | 0.0124   | 0.006 | 2.265  | 251 | <b>0.023*</b>    | [0.0017, 0.0232]   |
| <b>Right HCB - MD</b>                    | -0.0024  | 0.001 | -2.167 | 251 | <b>0.030*</b>    | [-0.0046, -0.0002] |
| <b>Right HCB - AxD</b>                   | -0.0021  | 0.002 | -1.449 | 251 | 0.145            | [-0.0050, 0.0007]  |
| <b>Right HCB - RD</b>                    | -0.0027  | 0.001 | -2.393 | 251 | <b>0.016*</b>    | [-0.0050, -0.0005] |
| <b>Right UF - FA</b>                     | 0.0179   | 0.006 | 2.922  | 248 | <b>0.004**</b>   | [0.0059, 0.0299]   |
| <b>Right UF - MD</b>                     | -0.0028  | 0.001 | -3.142 | 248 | <b>0.002**</b>   | [-0.0046, -0.0011] |
| <b>Right UF - AxD</b>                    | -0.0016  | 0.001 | -1.424 | 248 | 0.158            | [-0.0038, 0.0006]  |
| <b>Right UF - RD</b>                     | -0.0034  | 0.001 | -3.691 | 248 | <b>0.0003***</b> | [-0.0052, -0.0016] |

Robust linear regressions with Huber-M estimator and covaried for age, education and sex. For the UF the tract could not be estimated in 3 cases (n=253, for the HCB: n=256 independent participants). Abbreviations: HCB = Hippocampal cingulum; UF = Uncinate Fasciculus; FA = Fractional Anisotropy; MD = Mean Diffusivity; AxD = Axial Diffusivity; RD = Radial diffusivity, CI= Confidence interval. Estimates for FA were multiplied by  $10^3$  and for MD, AxD and RD by  $10^6$ . \*: p-value < 0.05; \*\*: p-value < 0.01; \*\*\*: p-value < 0.001. All p-values are two-sided.

**Table2:** Hippocampal volume predicting changes in tract diffusivity over time

| Predictor:<br>Hippocampal volume<br>at baseline      | Hippocampal cingulum change<br>(observations = 386)         |               |                       | Uncinate fasciculus change<br>(observations = 379)         |         |                      |
|------------------------------------------------------|-------------------------------------------------------------|---------------|-----------------------|------------------------------------------------------------|---------|----------------------|
|                                                      | Estimate<br>(SE)                                            | p-value       | 95% CI                | Estimate<br>(SE)                                           | p-value | 95% CI               |
| <b>Fractional Anisotropy</b>                         |                                                             |               |                       |                                                            |         |                      |
| • Left                                               | 0.003<br>(0.002)                                            | 0.186         | [-0.0013,<br>0.0068]  | 0.003<br>(0.002)                                           | 0.232   | [-0.0019,<br>0.0076] |
| • Right                                              | 0.003<br>(0.002)                                            | 0.123         | [-0.0009,<br>0.0076]  | 0.002<br>(0.002)                                           | 0.243   | [-0.0019,<br>0.0072] |
| <b>Mean diffusivity</b>                              |                                                             |               |                       |                                                            |         |                      |
| • Left                                               | -0.0006<br>(0.0008)                                         | 0.417         | [-0.0022,<br>0.0009]  | 0.001<br>(0.002)                                           | 0.675   | [-0.0038,<br>0.0058] |
| • Right                                              | -0.002<br>(0.0009)                                          | <b>0.025*</b> | [-0.0038,<br>-0.0003] | 0.0005<br>(0.0005)                                         | 0.283   | [-0.0004,<br>0.0015] |
| <b>Axial diffusivity</b>                             |                                                             |               |                       |                                                            |         |                      |
| • Left                                               | -0.0005<br>(0.0009)                                         | 0.558         | [-0.0023,<br>0.0013]  | 0.002<br>(0.003)                                           | 0.443   | [-0.0037,<br>0.0084] |
| • Right                                              | -0.0020<br>(0.001)                                          | <b>0.032*</b> | [-0.0042,<br>-0.0002] | 0.0008<br>(0.0007)                                         | 0.251   | [-0.0005,<br>0.0021] |
| <b>Radial diffusivity</b>                            |                                                             |               |                       |                                                            |         |                      |
| • Left                                               | -0.0007<br>(0.0007)                                         | 0.360         | [-0.0021,<br>0.0008]  | 0.0005<br>(0.002)                                          | 0.822   | [-0.0037,<br>0.0047] |
| • Right                                              | -0.0019<br>(0.0008)                                         | <b>0.022*</b> | [-0.0036,<br>-0.0003] | 0.0003<br>(0.0005)                                         | 0.506   | [-0.0006,<br>0.0012] |
| <b>Predictor:<br/>Hippocampal volume<br/>changes</b> | <b>Hippocampal cingulum change<br/>(observations = 386)</b> |               |                       | <b>Uncinate fasciculus change<br/>(observations = 379)</b> |         |                      |
|                                                      | Estimate<br>(SE)                                            | p-value       | 95% CI                | Estimate<br>(SE)                                           | p-value | 95% CI               |
| <b>Fractional Anisotropy</b>                         |                                                             |               |                       |                                                            |         |                      |
| • Left                                               | 0.107<br>(0.068)                                            | 0.122         | [-0.020,<br>0.139]    | -0.084<br>(0.084)                                          | 0.318   | [-0.251,<br>0.082]   |
| • Right                                              | 0.059<br>(0.040)                                            | 0.143         | [-0.020,<br>0.138]    | 0.049<br>(0.042)                                           | 0.251   | [-0.035,<br>0.133]   |
| <b>Mean diffusivity</b>                              |                                                             |               |                       |                                                            |         |                      |
| • Left                                               | -0.029<br>(0.028)                                           | 0.292         | [-0.084,<br>0.029]    | -0.041<br>(0.085)                                          | 0.629   | [-0.210,<br>0.127]   |
| • Right                                              | -0.037<br>(0.017)                                           | <b>0.030*</b> | [-0.070, -<br>0.004]  | 0.004<br>(0.001)                                           | 0.620   | [-0.013,<br>0.022]   |
| <b>Axial diffusivity</b>                             |                                                             |               |                       |                                                            |         |                      |
| • Left                                               | -0.027<br>(0.033)                                           | 0.413         | [-0.091,<br>0.037]    | -0.032<br>(0.106)                                          | 0.762   | [-0.243,<br>0.178]   |
| • Right                                              | -0.040<br>(0.019)                                           | <b>0.038*</b> | [-0.078, -<br>0.002]  | 0.008<br>(0.012)                                           | 0.533   | [-0.017,<br>0.032]   |
| <b>Radial diffusivity</b>                            |                                                             |               |                       |                                                            |         |                      |
| • Left                                               | -0.031<br>(0.026)                                           | 0.245         | [-0.083,<br>0.021]    | -0.042<br>(0.075)                                          | 0.573   | [-0.191,<br>0.106]   |
| • Right                                              | -0.035<br>(0.016)                                           | <b>0.029*</b> | [-0.066, -<br>0.004]  | 0.0001<br>(0.008)                                          | 0.936   | [-0.016,<br>0.017]   |

Linear Mixed effects models modeling random intercepts for each individual and a random slope over time with hippocampal volume at baseline (upper panel) or hippocampal volume change over time (lower panel) as predictor and diffusion values of the tract over time as outcome. All models were covaried for age, sex and education and their interaction with time (if  $p < 0.10$ ). Age was centered at 74.07

years, education at 15.84 and female was the reference for sex. Estimates for FA were multiplied by  $10^3$  and for MD, AxD and RD  $10^5$ . \*: p-value < 0.05

**Supplementary Table 3:** Tract diffusivity predicting changes in hippocampal volume over time

| Outcome :<br>Hippocampal<br>volume change | Hippocampal cingulum baseline<br>(observations = 466) |         |                    | Uncinate fasciculus baseline<br>(observations = 462) |         |                    |
|-------------------------------------------|-------------------------------------------------------|---------|--------------------|------------------------------------------------------|---------|--------------------|
|                                           | Estimate<br>(SE)                                      | p-value | 95% CI             | Estimate<br>(SE)                                     | p-value | 95% CI             |
| <b>Fractional Anisotropy</b>              |                                                       |         |                    |                                                      |         |                    |
| • Left                                    | -0.033<br>(0.134)                                     | 0.803   | [-0.297,<br>0.231] | -0.022<br>(0.123)                                    | 0.861   | [-0.265,<br>0.221] |
| • Right                                   | 0.130<br>(0.141)                                      | 0.357   | [-0.148,<br>0.409] | 0.055<br>(0.137)                                     | 0.689   | [-0.214,<br>0.324] |
| <b>Mean diffusivity</b>                   |                                                       |         |                    |                                                      |         |                    |
| • Left                                    | -0.315<br>(0.613)                                     | 0.608   | [-1.523,<br>0.893] | 0.282<br>(0.394)                                     | 0.475   | [-0.495,<br>1.058] |
| • Right                                   | -0.710<br>(0.465)                                     | 0.128   | [-1.628,<br>0.207] | -1.164<br>(0.755)                                    | 0.125   | [-2.653,<br>0.325] |
| <b>Axial diffusivity</b>                  |                                                       |         |                    |                                                      |         |                    |
| • Left                                    | -0.345<br>(0.557)                                     | 0.536   | [-1.444,<br>0.754] | 0.217<br>(0.321)                                     | 0.496   | [-0.415,<br>0.850] |
| • Right                                   | -0.624<br>(0.431)                                     | 0.150   | [-1.474,<br>0.227] | -0.913<br>(0.644)                                    | 0.158   | [-2.182,<br>0.357] |
| <b>Radial diffusivity</b>                 |                                                       |         |                    |                                                      |         |                    |
| • Left                                    | -0.237<br>(0.597)                                     | 0.691   | [-1.422,<br>0.938] | 0.302<br>(0.423)                                     | 0.476   | [-0.532,<br>1.137] |
| • Right                                   | -0.709<br>(0.470)                                     | 0.132   | [-1.635,<br>0.216] | -1.057<br>(0.736)                                    | 0.153   | [-2.507,<br>0.394] |
| Outcome :<br>Hippocampal<br>volume change | Hippocampal cingulum change<br>(observations = 466)   |         |                    | Uncinate fasciculus change<br>(observations = 462)   |         |                    |
|                                           | Estimate<br>(SE)                                      | p-value | 95% CI             | Estimate<br>(SE)                                     | p-value | 95% CI             |
| <b>Fractional Anisotropy</b>              |                                                       |         |                    |                                                      |         |                    |
| • Left                                    | 0.126<br>(0.208)                                      | 0.544   | [-0.285,<br>0.538] | -0.040<br>(0.191)                                    | 0.835   | [-0.417,<br>0.337] |
| • Right                                   | -0.056<br>(0.230)                                     | 0.807   | [-0.512,<br>0.399] | 0.134<br>(0.212)                                     | 0.527   | [-0.285,<br>0.553] |
| <b>Mean diffusivity</b>                   |                                                       |         |                    |                                                      |         |                    |
| • Left                                    | -0.377<br>(0.740)                                     | 0.611   | [-1.842,<br>1.087] | 0.870<br>(0.642)                                     | 0.178   | [-0.402,<br>2.142] |
| • Right                                   | -0.011<br>(0.748)                                     | 0.988   | [-1.491,<br>1.468] | -1.294<br>(1.156)                                    | 0.266   | [-3.583,<br>0.996] |
| <b>Axial diffusivity</b>                  |                                                       |         |                    |                                                      |         |                    |
| • Left                                    | -0.327<br>(0.667)                                     | 0.624   | [-1.647,<br>0.992] | 0.308<br>(0.520)                                     | 0.555   | [-0.722,<br>1.337] |
| • Right                                   | -0.072<br>(0.654)                                     | 0.913   | [-1.366,<br>1.222] | -0.898<br>(1.027)                                    | 0.384   | [-2.932,<br>1.135] |
| <b>Radial diffusivity</b>                 |                                                       |         |                    |                                                      |         |                    |
| • Left                                    | -0.421<br>(0.746)                                     | 0.573   | [-1.896,<br>1.055] | 1.234<br>(0.692)                                     | 0.077   | [-0.137,<br>2.604] |
| • Right                                   | -0.178<br>(0.767)                                     | 0.817   | [-1.697,<br>1.341] | -1.278<br>(1.109)                                    | 0.252   | [-3.474,<br>0.919] |

Linear Mixed effects models with random intercepts for each individual and random slope for time modeling tract diffusivity at baseline (upper panel) or tract diffusivity change over time (lower panel) as predictor and hippocampal volume over time as outcome. All models were covaried for age, sex and education and their interaction with time (if  $p < 0.10$ ). Age was centered at 74.07 years, education at 15.84 and female was the reference for sex. Estimates for FA were multiplied by  $10^3$  and for MD, AxD and RD  $10^5$ .

**Supplementary Table 4:** Baseline tract diffusivity predicting changes in PCC tau over time

| Outcome :<br>PCC tau changes | Hippocampal cingulum at baseline<br>(observations = 212) |               |                       | Uncinate fasciculus at baseline<br>(observations = 209) |         |                      |
|------------------------------|----------------------------------------------------------|---------------|-----------------------|---------------------------------------------------------|---------|----------------------|
|                              | Estimate<br>(SE)                                         | p-value       | 95% CI                | Estimate<br>(SE)                                        | p-value | 95% CI               |
| <b>Fractional Anisotropy</b> |                                                          |               |                       |                                                         |         |                      |
| • Left                       | 0.0002<br>(0.0002)                                       | 0.318         | [-0.0002,<br>0.0007]  | -0.00002<br>(0.0003)                                    | 0.951   | [-0.0005,<br>0.0005] |
| • Right                      | -0.0003<br>(0.0002)                                      | 0.099         | [-0.0008,<br>0.00007] | -0.0002<br>(0.0002)                                     | 0.311   | [-0.0006,<br>0.0002] |
| <b>Mean diffusivity</b>      |                                                          |               |                       |                                                         |         |                      |
| • Left                       | -0.001<br>(0.001)                                        | 0.356         | [-0.0038,<br>0.0014]  | 0.001<br>(0.0008)                                       | 0.186   | [-0.0018,<br>0.0033] |
| • Right                      | 0.002<br>(0.001)                                         | <b>0.012*</b> | [0.0004,<br>0.0035]   | 0.0008<br>(0.0001)                                      | 0.544   | [-0.0005,<br>0.0027] |
| <b>Axial diffusivity</b>     |                                                          |               |                       |                                                         |         |                      |
| • Left                       | -0.001<br>(0.001)                                        | 0.543         | [-0.0032,<br>0.0017]  | 0.0009<br>(0.0007)                                      | 0.192   | [-0.0004,<br>0.0022] |
| • Right                      | 0.002<br>(0.001)                                         | <b>0.028*</b> | [0.0002,<br>0.0031]   | 0.0003<br>(0.001)                                       | 0.810   | [-0.0019,<br>0.0024] |
| <b>Radial diffusivity</b>    |                                                          |               |                       |                                                         |         |                      |
| • Left                       | -0.001<br>(0.001)                                        | 0.331         | [-0.0035,<br>0.0012]  | 0.001<br>(0.001)                                        | 0.202   | [-0.0006,<br>0.0028] |
| • Right                      | 0.002<br>(0.001)                                         | <b>0.011*</b> | [0.0005,<br>0.0035]   | 0.0009<br>(0.001)                                       | 0.447   | [-0.0015,<br>0.0034] |

Linear Mixed effects models modeling random intercepts for each individual (and random slope for time) with tract diffusivity at baseline as predictor and PCC tau over time as outcome. All models were covaried for age, sex and education and their interaction with time (if  $p < 0.10$ ). Age was centered at 74.07 years, education at 15.84 and female was the reference for sex. Estimates for FA were multiplied by  $10^3$  and for MD, AxD and RD  $10^5$ . PCC = Posterior Cingulate Cortex; \*: p-value < 0.05

**Supplementary Table 5:** Baseline tract diffusivity predicting changes in Inferior temporal tau over time

| Outcome :<br>Inferior temporal tau changes | Hippocampal cingulum at baseline<br>(observations = 212) |         |                      |
|--------------------------------------------|----------------------------------------------------------|---------|----------------------|
|                                            | Estimate (SE)                                            | p-value | 95% CI               |
| <b>Fractional Anisotropy</b>               |                                                          |         |                      |
| • Left                                     | -0.00004<br>(0.0001)                                     | 0.823   | [-0.0004,<br>0.0003] |
| • Right                                    | -0.000001<br>(0.0002)                                    | 0.997   | [-0.0004,<br>0.0004] |
| <b>Mean diffusivity</b>                    |                                                          |         |                      |
| • Left                                     | -0.0004<br>(0.001)                                       | 0.657   | [-0.0026,<br>0.0016] |
| • Right                                    | 0.0004<br>(0.001)                                        | 0.517   | [-0.0009,<br>0.0018] |
| <b>Axial diffusivity</b>                   |                                                          |         |                      |
| • Left                                     | -0.001<br>(0.001)                                        | 0.345   | [-0.0031,<br>0.0011] |
| • Right                                    | 0.0005<br>(0.001)                                        | 0.427   | [-0.0008,<br>0.0018] |
| <b>Radial diffusivity</b>                  |                                                          |         |                      |
| • Left                                     | -0.0002<br>(0.001)                                       | 0.857   | [-0.0021,<br>0.0018] |
| • Right                                    | 0.0004<br>(0.001)                                        | 0.578   | [-0.0010,<br>0.0017] |

Linear Mixed effects models modeling random intercepts for each individual with tract diffusivity at baseline as predictor and inferior temporal tau over time as outcome. All models were covaried for age, sex and education and their interaction with time (if  $p < 0.10$ ). Age was centered at 74.07 years, education at 15.84 and female was the reference for sex. Estimates for FA were multiplied by  $10^3$  and for MD, AxD and RD by  $10^5$ .

**Supplementary Table 6:** Baseline tract diffusivity predicting changes in PCC tau over time differently for amyloid positive and amyloid negative individuals

| Outcome :<br>PCC tau changes                  | Hippocampal cingulum at baseline<br>(observations = 210) |                 |                        |
|-----------------------------------------------|----------------------------------------------------------|-----------------|------------------------|
|                                               | Estimate (SE)                                            | p-value         | 95% CI                 |
| <b>Fractional Anisotropy x amyloid status</b> |                                                          |                 |                        |
| • Left                                        | -0.0006<br>(0.0004)                                      | 0.233           | [-0.0016,<br>0.0004]   |
| • Right                                       | -0.002<br>(0.0004)                                       | <b>0.0004**</b> | [-0.0025,<br>-0.00075] |
| <b>Mean diffusivity x amyloid status</b>      |                                                          |                 |                        |
| • Left                                        | 0.0009<br>(0.003)                                        | 0.775           | [-0.0056,<br>0.0074]   |
| • Right                                       | 0.004<br>(0.002)                                         | <b>0.012*</b>   | [0.0010,<br>0.0076]    |
| <b>Axial diffusivity x amyloid status</b>     |                                                          |                 |                        |
| • Left                                        | -0.002<br>(0.004)                                        | 0.538           | [-0.0076,<br>0.0040]   |
| • Right                                       | 0.002<br>(0.002)                                         | 0.118           | [-0.0006,<br>0.0056]   |
| <b>Radial diffusivity x amyloid status</b>    |                                                          |                 |                        |
| • Left                                        | 0.002<br>(0.003)                                         | 0.491           | [-0.0038,<br>0.0078]   |
| • Right                                       | 0.005<br>(0.002)                                         | <b>0.004*</b>   | [0.0016,<br>0.0081]    |

Linear Mixed effects models modeling random intercepts for each individual, tract diffusivity at baseline by amyloid status as predictor and PCC tau over time as outcome. All models were covaried for age, sex and education and their interaction with time (if  $p < 0.10$ ). Age was centered at 74.07 years, education at 15.84 and female was the reference for sex. Estimates for FA were multiplied by  $10^3$  and for MD, AxD and RD by  $10^5$ . \*: p-value < 0.05; \*\*: p-value < 0.01

**Supplementary Table 7:** Baseline tract diffusivity predicting changes in memory over time

| Outcome :<br>Memory change   | Hippocampal cingulum  |                  |                       | Hippocampal cingulum x<br>PCC Tau status |               |                       | Hippocampal cingulum x<br>IT Tau status |         |                      |
|------------------------------|-----------------------|------------------|-----------------------|------------------------------------------|---------------|-----------------------|-----------------------------------------|---------|----------------------|
|                              | (observations = 1167) |                  |                       | (observations = 714)                     |               |                       | (observations = 714)                    |         |                      |
|                              | Estimate<br>(SE)      | p-value          | 95% CI                | Estimate<br>(SE)                         | p-value       | 95% CI                | Estimate<br>(SE)                        | p-value | 95% CI               |
| <b>Fractional Anisotropy</b> |                       |                  |                       |                                          |               |                       |                                         |         |                      |
| • Left                       | 0.001<br>(0.0003)     | <b>0.003**</b>   | [0.0003,<br>0.0015]   | 0.0001<br>(0.0007)                       | 0.837         | [-0.0012,<br>0.0015]  | 0.002<br>(0.002)                        | 0.195   | [-0.0011,<br>0.0052] |
| • Right                      | 0.0009<br>(0.0003)    | <b>0.0005***</b> | [0.0004,<br>0.0015]   | 0.0006<br>(0.0007)                       | 0.345         | [-0.0007,<br>0.0020]  | 0.0009<br>(0.001)                       | 0.467   | [-0.0015,<br>0.0034] |
| <b>Mean diffusivity</b>      |                       |                  |                       |                                          |               |                       |                                         |         |                      |
| • Left                       | -0.003<br>(0.001)     | <b>0.011*</b>    | [-0.0055,<br>-0.0007] | 0.002<br>(0.003)                         | 0.466         | [-0.0039,<br>0.0085]  | 0.008<br>(0.007)                        | 0.241   | [-0.0058,<br>0.0231] |
| • Right                      | -0.002<br>(0.0009)    | <b>0.007**</b>   | [-0.0042,<br>-0.0006] | -0.006<br>(0.002)                        | <b>0.015*</b> | [-0.0103,<br>-0.0011] | -0.005<br>(0.003)                       | 0.150   | [-0.0110,<br>0.0017] |
| <b>Axial diffusivity</b>     |                       |                  |                       |                                          |               |                       |                                         |         |                      |
| • Left                       | -0.002<br>(0.001)     | 0.148            | [-0.0037,<br>0.0006]  | 0.004<br>(0.002)                         | 0.184         | [-0.0019,<br>0.0098]  | 0.011<br>(0.006)                        | 0.063   | [-0.0006,<br>0.0022] |
| • Right                      | -0.001<br>(0.0008)    | 0.083            | [-0.0030,<br>0.0002]  | -0.005<br>(0.002)                        | <b>0.023*</b> | [-0.0093,<br>-0.0007] | -0.005<br>(0.003)                       | 0.094   | [-0.0114,<br>0.0010] |
| <b>Radial diffusivity</b>    |                       |                  |                       |                                          |               |                       |                                         |         |                      |
| • Left                       | -0.004<br>(0.001)     | <b>0.003**</b>   | [-0.0061,<br>-0.0013] | 0.001<br>(0.003)                         | 0.680         | [-0.0047,<br>0.0072]  | 0.004<br>(0.007)                        | 0.572   | [-0.0105,<br>0.0189] |
| • Right                      | -0.003<br>(0.0009)    | <b>0.002**</b>   | [-0.0047,<br>-0.0011] | -0.006<br>(0.002)                        | <b>0.017*</b> | [-0.0102,<br>-0.0010] | -0.004<br>(0.003)                       | 0.185   | [-0.0106,<br>0.0021] |

Linear Mixed effects models modeling random intercepts for each individual, tract diffusivity at baseline as predictor and memory as outcome. All models were covaried for age, sex and education and their interaction with time (if  $p < 0.10$ ). Age was centered at 74.07 years, education at 15.84 and female was the reference for sex. Estimates for FA were multiplied by  $10^3$  and for MD, AxD and RD by  $10^5$ . \*: p-value  $< 0.05$ ; \*\*: p-value  $< 0.01$ ; \*\*\*: p-value  $< 0.001$

**Supplementary Table 8:** Baseline tract diffusivity predicting changes in executive functions over time

| Outcome :<br>Executive function<br>change | Hippocampal cingulum<br>(observations = 1157) |         |                      | Hippocampal cingulum x<br>PCC Tau status<br>(observations = 711) |         |                      | Hippocampal cingulum x<br>IT Tau status<br>(observations = 711) |         |                      |
|-------------------------------------------|-----------------------------------------------|---------|----------------------|------------------------------------------------------------------|---------|----------------------|-----------------------------------------------------------------|---------|----------------------|
|                                           | Estimate<br>(SE)                              | p-value | 95% CI               | Estimate<br>(SE)                                                 | p-value | 95% CI               | Estimate<br>(SE)                                                | p-value | 95% CI               |
| <b>Fractional Anisotropy</b>              |                                               |         |                      |                                                                  |         |                      |                                                                 |         |                      |
| • Left                                    | 0.0002<br>(0.0002)                            | 0.306   | [-0.0002,<br>0.0007] | -0.001<br>(0.001)                                                | 0.383   | [-0.0016,<br>0.0006] | -0.0007<br>(0.001)                                              | 0.580   | [-0.0033,<br>0.0019] |
| • Right                                   | 0.0001<br>(0.0002)                            | 0.611   | [-0.0003,<br>0.0005] | 0.0004<br>(0.001)                                                | 0.431   | [-0.0007,<br>0.0016] | 0.0005<br>(0.001)                                               | 0.636   | [-0.0016,<br>0.0025] |
| <b>Mean diffusivity</b>                   |                                               |         |                      |                                                                  |         |                      |                                                                 |         |                      |
| • Left                                    | -0.0008<br>(0.001)                            | 0.424   | [-0.0026,<br>0.0011] | 0.0004<br>(0.003)                                                | 0.882   | [-0.0045,<br>0.0053] | 0.0017<br>(0.006)                                               | 0.781   | [-0.0101,<br>0.0135] |
| • Right                                   | -0.0004<br>(0.001)                            | 0.580   | [-0.0018,<br>0.0010] | 0.001<br>(0.002)                                                 | 0.532   | [-0.0025,<br>0.0048] | 0.0001<br>(0.003)                                               | 0.974   | [-0.0051,<br>0.0053] |
| <b>Axial diffusivity</b>                  |                                               |         |                      |                                                                  |         |                      |                                                                 |         |                      |
| • Left                                    | -0.0004<br>(0.001)                            | 0.622   | [-0.0021,<br>0.0013] | -0.001<br>(0.002)                                                | 0.764   | [-0.0053,<br>0.0039] | 0.0007<br>(0.005)                                               | 0.877   | [-0.0084,<br>0.0098] |
| • Right                                   | -0.0002<br>(0.001)                            | 0.707   | [-0.0015,<br>0.0010] | 0.002<br>(0.002)                                                 | 0.287   | [-0.0016,<br>0.0053] | 0.0003<br>(0.002)                                               | 0.898   | [-0.0047,<br>0.0053] |
| <b>Radial diffusivity</b>                 |                                               |         |                      |                                                                  |         |                      |                                                                 |         |                      |
| • Left                                    | -0.0008<br>(0.001)                            | 0.358   | [-0.0028,<br>0.0010] | 0.001<br>(0.002)                                                 | 0.696   | [-0.0038,<br>0.0057] | 0.0023<br>(0.006)                                               | 0.701   | [-0.0096,<br>0.0144] |
| • Right                                   | -0.0005<br>(0.001)                            | 0.523   | [-0.0019,<br>0.0010] | 0.001<br>(0.002)                                                 | 0.708   | [-0.0030,<br>0.0044] | -0.0001<br>(0.003)                                              | 0.979   | [-0.0053,<br>0.0051] |

Linear Mixed effects models modeling random intercepts for each individual, tract diffusivity at baseline as predictor and executive function as outcome. All models were covaried for age, sex and education and their interaction with time (if  $p < 0.10$ ). Age was centered at 74.07 years, education at 15.84 and female was the reference for sex. Estimates for FA were multiplied by  $10^3$  and for MD, AxD and RD by  $10^5$ .
